# Supplementary material
Source: PubMed Central journal article supplement (PMC4473235)

## Supplementary data

Global multilocus sequence type (MLST) analysis of *Chlamydia trachomatis* strains from 16 countries

### MLST from whole genome analysis

#### Materials and Methods

**Suppl Table 1: List of genomes used for MLST analysis**

| ST      | Short name | Accession number |
|---------|------------|------------------|
| 108     | ST108-1    | ERR386231_58082  |
| 12      | ST12-1     | NZ_ACFJ01000001  |
| 12      | ST12-2     | NC_017953        |
| 12      | ST12-3     | ERR164690_9528   |
| 3       | ST3-1      | ERR108280_9613   |
| 52      | ST52-1     | NC_017432        |
| 52      | ST52-2     | NC_017440        |
| 52      | ST52-3     | ERR108295_9615   |
| 56      | ST56-1     | NC_017952        |
| 56      | ST56-2     | NC_017439        |
| 59      | ST59-1     | ERR111561_10581  |
| 59      | ST59-2     | ERR210999_42767  |
| 136     | ST136-1    | 6276s_689        |
| unknown | UNK-1      | B-Jali20-OT_693  |
| 35      | ST35-1     | D-SotonD6_10483  |
| unknown | UNK-2      | E-Bour_10504     |
| unknown | UNK-3      | ERR021962_9459   |
| unknown | UNK-4      | ERR026568_9527   |
| unknown | UNK-5      | ERR034339_9538   |
| 24      | ST24-1     | ERR111610_9600   |
| 55      | ST55-1     | ERR211055_42800  |
| unknown | UNK-6      | E-SW3_10471      |
| unknown | UNK-7      | G-SotonG1_9499   |
| 20      | ST20-1     | NC_000117        |
| unknown | UNK-8      | NC_007429        |
| 278     | ST278-1    | NC_017430        |
| unknown | UNK-9      | NC_020929        |
| 144     | ST144-1    | NC_020930        |
| unknown | UNK-10     | NC_020944        |
| unknown | UNK-11     | NC_020970        |
| unknown | UNK-12     | NC_021888        |
| 141     | ST141-1    | NC_021899        |
| 46      | ST46-1     | NC_023060        |
| unknown | UNK-13     | NZ_ABYG01000001  |

STs in red denotes founders that predominate in the database.

**Suppl table 2: Orthologous groups containing only genomes with founder profiles, groups representing more than one genome <sup>a</sup>**

| Group number           | Genomes represented                     | Similar to                                                                                         |
|------------------------|-----------------------------------------|----------------------------------------------------------------------------------------------------|
| I1.5_977               | ST108-1, ST12-1, ST12-3, ST52-1, ST52-2 | hypothetical protein G9768_00845 [Chlamydia trachomatis G/9768] Genovar G, male urethra specimen.  |
| I1.5_1011 <sup>b</sup> | ST108-1, ST52-3, ST59-1                 | putative gag-pol protein (mouse), RNase_HI_RT_Bel, integrase (98% id)                              |
| I1.5_1033              | ST52-1, ST52-2, ST52-3                  | hypothetical protein CTG9301_02525 [Chlamydia trachomatis G/9301] Genovar G, male rectal specimen. |
| I1.5_1054              | ST108-1, ST52-3                         | hypothetical protein [Plasmodium yoelii yoelii 17XNL] (90% id)                                     |
| I1.5_1055              | ST108-1, ST52-3                         | hypothetical protein [Plasmodium berghei ANKA] (96% id)                                            |
| I1.5_1058              | ST108-1, ST52-3                         | small fragment, (part of) integrase [Plasmodium yoelii yoelii 17XNL]                               |
| I1.5_1059              | ST108-1, ST59-1                         | hypothetical protein [Plasmodium berghei ANKA] (98% id)                                            |
| I1.5_1061 <sup>b</sup> | ST12-3, ST59-2                          | penicillin-binding protein [Chlamydia trachomatis E/150] Genovar E, rectum specimen.               |
| I1.5_1079              | ST3-1, ST59-2                           | hypothetical protein [Macaca fascicularis] (87% id)                                                |
| I1.5_1084 <sup>b</sup> | ST52-3, ST59-1                          | endonuclease/exonuclease/phosphatase [Plasmodium yoelii yoelii 17XNL] (99% id)                     |
| I1.5_1085              | ST52-3, ST59-1                          | mCG147802 [Mus musculus] (96% id)                                                                  |
| I1.5_1086              | ST52-3, ST59-1                          | Endonuclease domain (L1-EN) + RT_nLTR, ORF2 gb AAC72797.1  [Mus musculus domesticus]               |
| I1.5_1087 <sup>b</sup> | ST52-3, ST59-1                          | putative gag-pol protein [Mus musculus]                                                            |

<sup>a</sup> In addition to the 17 groups of orthologous proteins presented in the study 9 other groups were detected, but were only present in the draft genome ERR386231 (having ST108). These groups were caused by fragmented gene predictions and were excluded from further analyses.

<sup>b</sup> Sequence is part of a protein found in other genomes.

## Phylogenetic analysis

### Methods

For the *hr-CT-MLST* dataset three additional methods were used to account for conflicts in the concatenated alignment. Putative recombinant sequences were identified using the RDP, MaxChi, and BootScan statistics with default parameter settings in RDP4. In sequences indicated as recombinants the sequence indicated as coming from the minor parent was removed and the RAxML analysis redone as above. This analysis will be referred to as no recombinations. As an alternative rogue taxa, i.e. taxa lowering the support values

disproportionately [1] were identified using RogueNaRok at default settings [2]. The rogue taxa were then excluded from the phylogeny and support values recalculated. This analysis will be referred to as no rogues.

Conflicts between genes were removed as described in paper. This analysis is referred to as no conflict.

## Results

In the *hr-CT-MLST* dataset three genotypes were removed from *pbpB* due to long branches. Thirteen potential recombinations were identified out of 30 genotypes in CT144. This gene also had two regions suspected to have non-homologous introns and was therefore excluded from the concatenated analysis. No recombinations were detected in the other genes.

There were 414 unique MLST profiles in the database. To resolve conflicts between genes *pbpB* was removed for 75 strains, CT058 from 70 strains, *hctB* from 8 strains, and CT172 from 3 strains. No single strain had more than one gene removed. After removing conflicts the tree is in large agreement with Harris et al. [3], see Fig. S1. The only conflict supported with BS >70 is the same conflict described above for the L strain clade in the Harris et al. dataset. Like in the Harris et al. dataset, there are also several differences in the clade composing G, D, K, Ia, and J strains, but these differences does not have high support from the Database dataset. Since the *hr-CT-MLST* dataset include many more strains it is not surprising that it also includes clades that are not present in the Harris dataset or in Harris et al. [3]. Six strains were found in intermediate position between clades, and were identified by at least one of the three methods as putative recombinant or rogue taxa and their phylogenetic position may therefore be an artifact of unresolved conflicts between genes.

RDP4 identified 230 recombinant strains from the concatenated alignment. The no-recombinations tree identified many of the same clusters as the no-conflict tree but the relationships between the clusters and the patterns of nestedness were very different between the two. The no-recombinations tree is in much less agreement with Harris et al. [3] than the no-conflict tree (data not shown).

RogueNaRok identified 293 rogue taxa which were removed from the tree. The no rogue tree is in large agreement with the no-conflict tree (data not shown). The most notable difference was in the position of strains that had conflict between genes but were not identified as rogue taxa. The no rogue tree has the same basic disagreements with Harris et al. [3] as the no-conflict tree although many of the strains from Harris et al. were removed as rogue taxa.

## References

1. Thomson RC, Shaffer HB. Sparse supermatrices for phylogenetic inference: taxonomy, alignment, rogue taxa, and the phylogeny of living turtles. *Syst Biol* 2010; 59: 42–58.
2. Aberer AJ, Krompass D, Stamatakis A. Pruning rogue taxa improves phylogenetic accuracy: an efficient algorithm and webservice. *Syst Biol* 2013; 62: 162–6.
3. Harris SR, Clarke IN, Seth-Smith HMB et al. Whole-genome analysis of diverse *Chlamydia trachomatis* strains identifies phylogenetic relationships masked by current clinical typing. *Nat Genet* 2012; 44: 413–9, S1.

### **Figure legend to Fig. S1**

Phylogenetic tree of the hr\_CT-MLST dataset by maximum likelihood analysis after removal of recombination events. The tree comprised 418 unique MLST STs including 52 STs from Harris et al (3). Numbers on nodes represent percentage of bootstrap replicates supporting each clade. The tree was rooted using the L strains as outgroup. Code for branch designations: Specimen number\_genovar\_allele numbers for hctB\_CT 058 \_CT 172\_pbpB\_ST5 number.

Fig. S1.

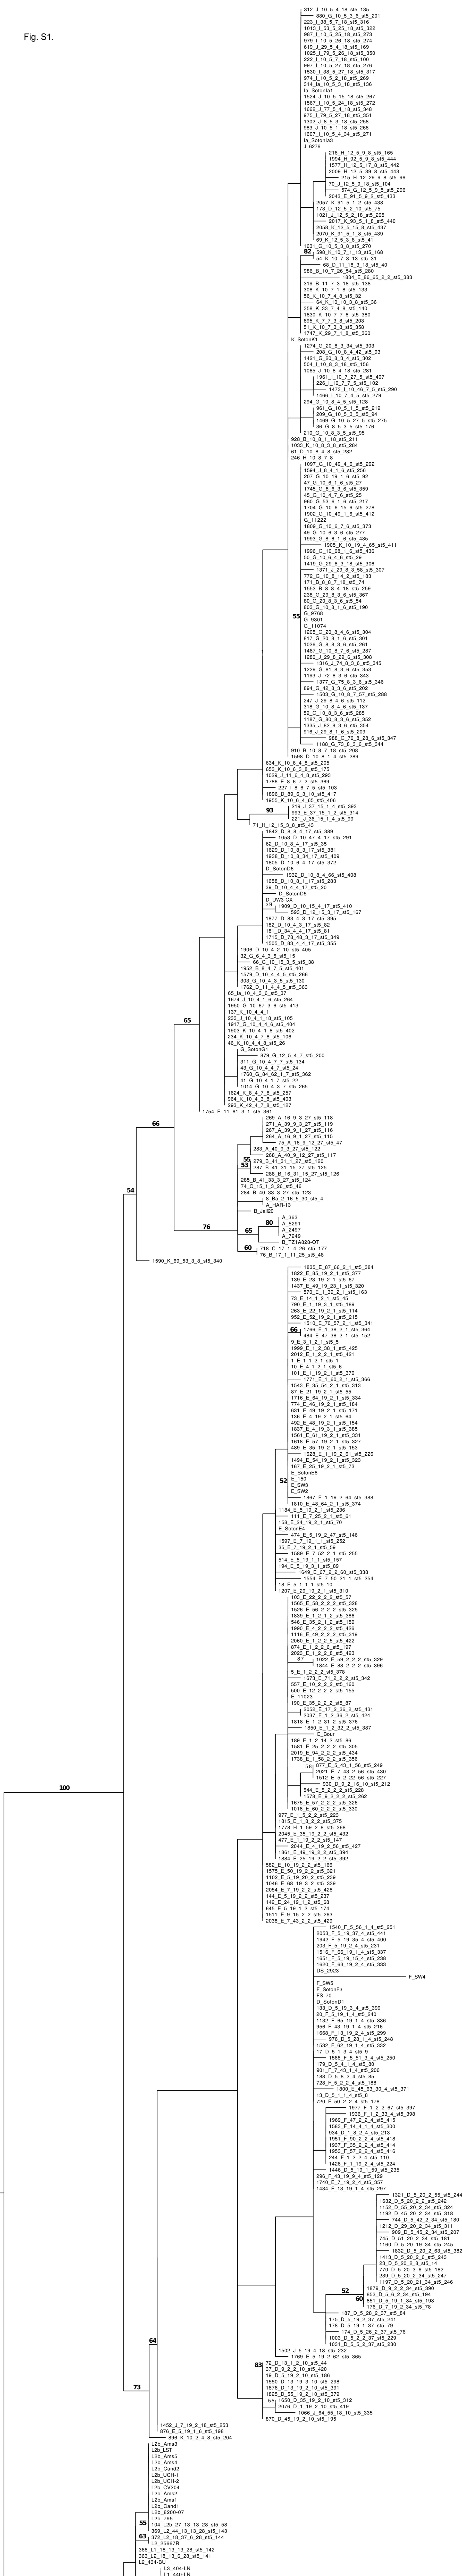

Supplement: JCM.00249-15_zjm999094336so1.pdf [file JCM.00249-15_zjm999094336so1.pdf]
